# Supplementary material for: Consumer Nutritional Awareness, Sustainability Knowledge, and Purchase Intention of Environmentally Friendly Cookies in Croatia, France, and North Macedonia
Source: MDPI journal article supplement (doi:10.3390/foods12213932), 2023-10-27
Supplement: s1 [file s1]

**Table S1.** Purchase intention of whole grain, nutritionally improved and sustainable cookies by generations (number with percentage in brackets).

|                                                                                                                                                                                                                                   | Generation<br>Z, n = 191 | Generation<br>Y, n = 337 | Generation<br>X, n = 153 | Silver<br>Generation,<br>n = 76 |
|-----------------------------------------------------------------------------------------------------------------------------------------------------------------------------------------------------------------------------------|--------------------------|--------------------------|--------------------------|---------------------------------|
| <i>I buy whole grain cookies because they are good for health</i>                                                                                                                                                                 |                          |                          |                          |                                 |
| I completely agree                                                                                                                                                                                                                | 16 (8)                   | 49 (14)                  | 25 (16)                  | 23 (30)                         |
| I partially agree                                                                                                                                                                                                                 | 57 (30)                  | 129 (38)                 | 62 (40)                  | 25 (33)                         |
| I neither agree nor disagree                                                                                                                                                                                                      | 51 (27)                  | 100 (30)                 | 28 (18)                  | 18 (24)                         |
| I somewhat disagree                                                                                                                                                                                                               | 22 (12)                  | 21 (6)                   | 10 (7)                   | 2 (3)                           |
| I do not agree at all                                                                                                                                                                                                             | 31 (16)                  | 29 (9)                   | 18 (12)                  | 7 (9)                           |
| Did not answer                                                                                                                                                                                                                    | 14 (7)                   | 9 (3)                    | 10 (7)                   | 1 (1)                           |
| <i>Would you be attracted to a cookie with a changed or improved nutritional value (e.g., less sugar and/or fat, added minerals, added fiber, added antioxidants) if you knew that it had a beneficial effect on your health?</i> |                          |                          |                          |                                 |
| Yes                                                                                                                                                                                                                               | 155 (81)                 | 266 (79)                 | 119 (78)                 | 61 (80.3)                       |
| No                                                                                                                                                                                                                                | 24 (13)                  | 62 (18)                  | 26 (17)                  | 14 (18.4)                       |
| Did not answer                                                                                                                                                                                                                    | 12 (6)                   | 9 (3)                    | 8 (5)                    | 1 (1.3)                         |
| <i>Would you be willing to pay a higher price for cookies with altered or improved nutritional value (compared to a conventional cookie)?</i>                                                                                     |                          |                          |                          |                                 |
| Yes                                                                                                                                                                                                                               | 107 (56)                 | 243 (72)                 | 104 (68)                 | 51 (67.1)                       |
| No                                                                                                                                                                                                                                | 72 (38)                  | 86 (26)                  | 41 (27)                  | 24 (31.6)                       |
| Did not answer                                                                                                                                                                                                                    | 12 (6)                   | 8 (2)                    | 8 (5)                    | 1 (1.3)                         |
| <i>Would you be interested in buying cookies that, in addition to having a positive impact on human health, also has a positive impact on the environment?</i>                                                                    |                          |                          |                          |                                 |
| Yes                                                                                                                                                                                                                               | 184 (96)                 | 317 (94)                 | 145 (95)                 | 73 (96)                         |
| No                                                                                                                                                                                                                                | 7 (4)                    | 20 (6)                   | 8 (5)                    | 3 (4)                           |
| <i>Would you be willing to buy cookies with by-products of the food industry?</i>                                                                                                                                                 |                          |                          |                          |                                 |
| Yes                                                                                                                                                                                                                               | 152 (80)                 | 252 (75)                 | 96 (63)                  | 50 (66)                         |
| No                                                                                                                                                                                                                                | 39 (20)                  | 85 (25)                  | 57 (37)                  | 26 (34)                         |

**Table S2.** Purchase intention of whole grain, nutritionally improved and sustainable products by country (number with percentage in brackets).

|                                                                                                                                                                                                                                  | Croatia,<br>n = 472   | France,<br>n = 166    | North<br>Macedonia,<br>n = 119 |
|----------------------------------------------------------------------------------------------------------------------------------------------------------------------------------------------------------------------------------|-----------------------|-----------------------|--------------------------------|
| <i>I buy whole grain cookies because they are good for health</i>                                                                                                                                                                |                       |                       |                                |
| I completely agree                                                                                                                                                                                                               | 77 (16)               | 18 (11)               | 18 (15)                        |
| I partially agree                                                                                                                                                                                                                | 189 (40)              | 46 (28)               | 38 (32)                        |
| I neither agree nor disagree                                                                                                                                                                                                     | 123 (26)              | 48 (29)               | 26 (22)                        |
| I somewhat disagree                                                                                                                                                                                                              | 35 (7.5)              | 17 (10)               | 3 (2.5)                        |
| I do not agree at all                                                                                                                                                                                                            | 48 (10.5)             | 25 (15)               | 12 (10)                        |
| Did not answer                                                                                                                                                                                                                   |                       | 12 (7)                | 22 (18.5)                      |
| <i>Would you be attracted to a cookie with a changed or improved nutritional value (e.g. less sugar and/or fat, added minerals, added fiber, added antioxidants) if you knew that it had a beneficial effect on your health?</i> |                       |                       |                                |
| Yes                                                                                                                                                                                                                              | 385 (82)              | 129 (78)              | 87 (73)                        |
| No                                                                                                                                                                                                                               | 87 (18)               | 26 (15.5)             | 13 (11)                        |
| Did not answer                                                                                                                                                                                                                   |                       | 11 (6.5)              | 19 (16)                        |
| <i>Would you be willing to pay a higher price for cookies with altered or improved nutritional value (compared to a standard cookie)?</i>                                                                                        |                       |                       |                                |
| Yes                                                                                                                                                                                                                              | 352 (75)              | 78 (47)               | 75 (63)                        |
| No                                                                                                                                                                                                                               | 120 (25)              | 78 (47)               | 25 (21)                        |
| Did not answer                                                                                                                                                                                                                   |                       | 10 (6)                | 19 (16)                        |
| <i>Would you be interested in buying cookies that, in addition to having a positive impact on human health, also has a positive impact on the environment?</i>                                                                   |                       |                       |                                |
| Yes                                                                                                                                                                                                                              | 453 (96) <sup>a</sup> | 158 (95) <sup>a</sup> | 108 (91) <sup>b</sup>          |
| No                                                                                                                                                                                                                               | 19 (4) <sup>a</sup>   | 8 (5) <sup>a</sup>    | 11 (9) <sup>b</sup>            |
| <i>Would you be willing to buy cookies with by-products of the food industry?</i>                                                                                                                                                |                       |                       |                                |
| Yes                                                                                                                                                                                                                              | 361 (76) <sup>a</sup> | 140 (84) <sup>a</sup> | 49 (41) <sup>b</sup>           |
| No                                                                                                                                                                                                                               | 111 (24) <sup>a</sup> | 26 (16) <sup>a</sup>  | 70 (59) <sup>b</sup>           |

Would you be interested in buying a cookies that, in addition to having a positive impact on human health, also has a positive impact on the environment?  
 Num. of non-terminal nodes: 13, Num. of terminal nodes: 14

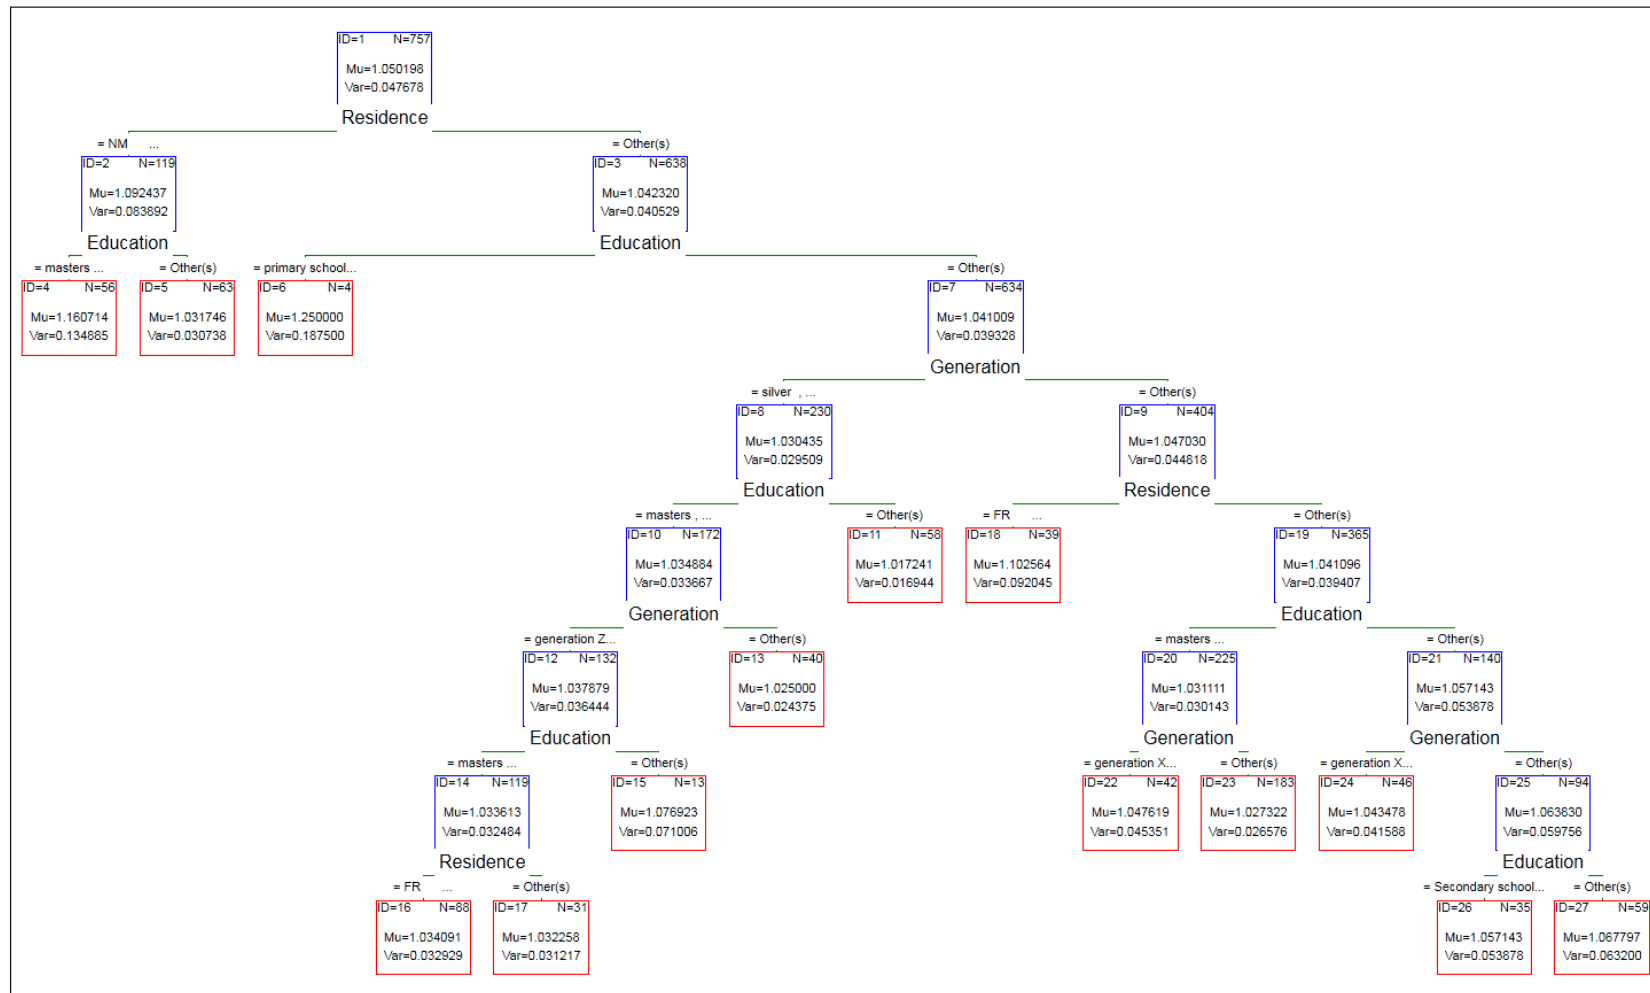

**Figure S1.** The classification and regression tree on the consumers interest in buying cookies that in addition to having a positive impact on human health, also have a positive impact on the environment.

Would you be willing to buy cookies with by-products of the food industry?

Num. of non-terminal nodes: 12, Num. of terminal nodes: 13

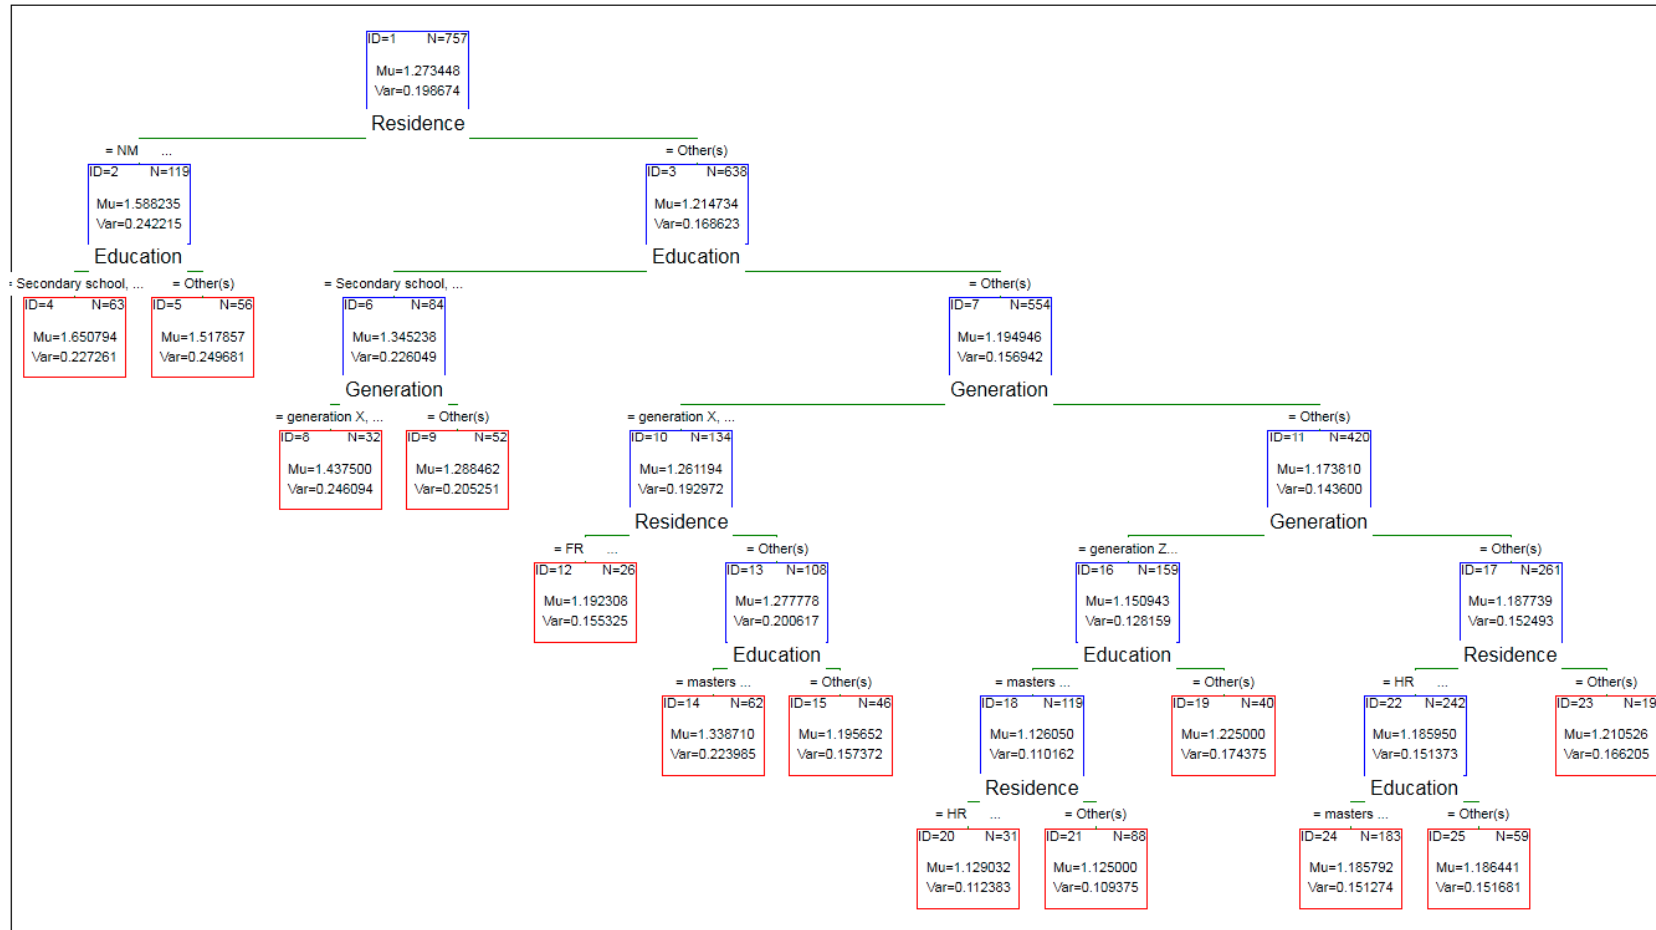

**Figure S2.** The classification and regression tree on the consumers' willingness to buy cookies with by-products of food industry.
